# Supplementary material for: Culture of Mycobacterium smegmatis in Different Carbon Sources to Induce In Vitro Cholesterol Consumption Leads to Alterations in the Host Cells after Infection: A Macrophage Proteomics Analysis
Source: MDPI journal article supplement (doi:10.3390/pathogens10060662), 2021-05-28
Supplement: s1 [file s1]

**Supplementary Table S2.** List of differentially regulated proteins from the group of macrophages infected with *Mycobacterium smegmatis* grown in minimal medium supplemented with cholesterol (MM + Cholesterol).

| Uniprot access code   | Protein                                                     | Fold-change | Biologic Process                                         | Molecular Function                                     |
|-----------------------|-------------------------------------------------------------|-------------|----------------------------------------------------------|--------------------------------------------------------|
| <i>Down-regulated</i> |                                                             |             |                                                          |                                                        |
| P50516                | V-type Proton ATPase (V-ATPase)                             | -1,1301     | Transmembrane proton transport / Phagosome acidification | ATP binding/ Proton-transporting ATPase activity       |
| G3UX26                | Voltage-dependent anion-selective channel protein 2 (VDAC2) | -1,06274    | Inorganic Transmembrane Anion Transport                  | Nucleotide Binding / Porin Activity                    |
| P11499                | Heat shock protein HSP 90-beta (Hsp90ab1)                   | -1,25473    | Protein folding, stabilization and degradation           | ATP binding/ Chaperone                                 |
| Q9WTX5                | S-phase kinase-associated protein 1 (Skp1a)                 | -1,71938    | Protein ubiquitination                                   | Beta-catenin binding                                   |
| Q8VDM4                | 26S proteasome non-ATPase regulatory subunit 2 (Psmc2)      | -1,0267     | Regulation of protein catabolic process                  | Enzyme regulator activity                              |
| P63028                | Translationally-controlled tumor protein (Tpt1)             | -1,72798    | Proliferation of Cell Population                         | Calcium ion binding/Apoptosis                          |
| P17742                | Peptidyl-prolyl cis-trans isomerase A (Ppia)                | -1,79436    | Lipid droplet organization                               | Cyclosporin A binding/ Unfolded protein binding        |
| A5D6P2                | Partitioning defective 3 homolog (Pard3)                    | -2,22628    | Bicellular tight junction assembly/ Cellular migration   | Identical protein binding/ Protein phosphatase binding |
| Q91Z83                | Myosin-7 (Myh7)                                             | -1,21607    | Processo Metabólico de ATP                               | Actin-dependent ATPase activity                        |

|            |                                                     |          |                                                 |                                                |
|------------|-----------------------------------------------------|----------|-------------------------------------------------|------------------------------------------------|
| P62962     | Profilin-1 (Pfn1)                                   | -1,63522 | Actin cytoskeleton organization                 | Actin binding                                  |
| O88342     | WD repeat-containing protein 1 (Wdr1)               | -1,34062 | Actin cytoskeleton organization                 | Actin binding                                  |
| F8WGL3     | Cofilin-1 (Cfl1)                                    | -2,03354 | Actin filament depolymerization                 | Actin binding                                  |
| E9Q3V6     | Septin-2 (Sept2)                                    | -1,53592 | Cytoskeleton-Dependent Cytokinesis              | GTP binding/ Atividade de GTP                  |
| D6RD00     | RNA 3'-terminal phosphate cyclase (Rtca)            | -1,28617 | RNA processing                                  | ATP binding/ RNA-3'-phosphate cyclase activity |
| G3UY38     | Heterogeneous nuclear ribonucleoprotein L (Hnrnpl)  | -1,3193  | mRNA processing                                 | RNA binding                                    |
| Q99KP6     | Pre-mRNA-processing factor 19 (Prpf19)              | -1,27397 | mRNA splicing and DNA repair                    | Ubiquitin protein ligase activity              |
| A0A0R4J259 | Heterogeneous nuclear ribonucleoprotein Q (Syncrip) | -1,35788 | mRNA processing                                 | RNA binding                                    |
| O08663     | Methionine aminopeptidase 2 (Metap2)                | -1,15093 | Peptidyl-methionine modification                | Aminopeptidase activity                        |
| P08030     | Adenine phosphoribosyltransferase (Aprt)            | -1,67802 | Adenine metabolic process                       | AMP binding/ Adenine binding                   |
| Q8BMJ2     | Leucine--tRNA ligase, cytoplasmic (Lars)            | -2,35294 | Cellular response to amino acid starvation      | Leucine-tRNA ligase activity                   |
| P40142     | Transketolase (Tkt)                                 | -1,35548 | Glyceraldehyde-3-phosphate biosynthetic process | Transketolase activity                         |
| Q9DBJ1     | Phosphoglycerate mutase 1 (Pgam1)                   | -2,1921  | Glycolytic process                              | Bisphosphoglycerate mutase activity            |

|        |                                                       |          |                                 |                                        |
|--------|-------------------------------------------------------|----------|---------------------------------|----------------------------------------|
| Q9JII6 | Aldo-keto reductase family 1 member A1 (Akr1a1)       | -2,63925 | Oxidation and Reduction Process | Oxidoreductase activity                |
| Q571I9 | Aldehyde dehydrogenase family 16 member A1 (Aldh16a1) | -1,07626 | Oxidation and Reduction Process | Oxidoreductase activity                |
| P45377 | Aldose reductase-related protein 2 (Akr1b8)           | -1,34839 | Oxidation and Reduction Process | Alcohol dehydrogenase (NADP+) activity |
| Q7TT23 | Uncharacterized protein                               | -1,0289  |                                 |                                        |

*Up-regulated*

|        |                                                                                                                         |          |                                         |                                                 |
|--------|-------------------------------------------------------------------------------------------------------------------------|----------|-----------------------------------------|-------------------------------------------------|
| Q6P9L6 | Kinesin-like protein KIF15 (Kif15)                                                                                      | 1,468724 | Microtubule-based movement              | ATP binding/ ATPase activity                    |
| P20152 | Vimentin (Vim)                                                                                                          | 1,380619 | Intermediate filament organization      | Structural constituent of cytoskeleton          |
| O35639 | Annexin A3 (Anxa3)                                                                                                      | 1,331567 | Neutrophil degranulation/ Phagocytosis  | Calcium ion binding                             |
| Q9D2G2 | Dihydrolipoyllysine-residue succinyltransferase component of 2-oxoglutarate dehydrogenase complex (Dlst), mitochondrial | 1,030822 | 2-oxoglutarate metabolic process        | Chaperone binding/ Succinyltransferase activity |
| E9Q4D0 | Proprotein convertase subtilisin/kexin type 6 (Pcsk6)                                                                   | 1,42278  | Glycoprotein metabolic process          | Heparin binding/ Endopeptidase activity         |
| P97807 | Fumarate hydratase, mitochondrial (Fh1)                                                                                 | 1,07059  | Tricarboxylic acid cycle                | Fumarate hydratase activity                     |
| Q3TXS7 | 26S proteasome non-ATPase regulatory subunit 1 (Psmc1)                                                                  | 1,421197 | Regulation of protein catabolic process | Enzyme regulator activity                       |
