# Supplementary material for: Culture of Mycobacterium smegmatis in Different Carbon Sources to Induce In Vitro Cholesterol Consumption Leads to Alterations in the Host Cells after Infection: A Macrophage Proteomics Analysis
Source: MDPI journal article supplement (doi:10.3390/pathogens10060662), 2021-05-28
Supplement: s1 [file s1]

**Supplementary Table S1.** List of differentially regulated proteins from the group of macrophages infected with *M. smegmatis* grown in complete 7H9 medium supplemented with glycerol (7H9 + Glycerol).

| Uniprot access code | Protein                                                         | Fold-change | Biologic Process                                              | Molecular Function                                       |
|---------------------|-----------------------------------------------------------------|-------------|---------------------------------------------------------------|----------------------------------------------------------|
|                     | <i>Down-regulated</i>                                           |             |                                                               |                                                          |
| Q9WUM4              | Coronin-1C                                                      | -1,383      | Endosome Fission/ Phagocytosis                                | Binding Rac-GTPase /<br>Binding actin filaments          |
| P68373              | Tubulin alpha-1C                                                | -1,079      | Microtubule Cytoskeleton<br>Organization / Mitotic Cell Cycle | GTP binding / GTPase<br>activity                         |
|                     | <i>Up-regulated</i>                                             |             |                                                               |                                                          |
| Q64337              | Sequestosome-1 (Sqstm1/p62)                                     | 1,139       | Autophagy receptor                                            | Ubiquitin-binding protein<br>p62                         |
| Q8K1N2              | Pleckstrin homology-like domain<br>family B member 2 (LL5-beta) | 1,296       | Microtubule Cytoskeleton<br>Organization                      | assembly of the<br>postsynaptic apparatus                |
| Q60974              | Nuclear receptor corepressor 1<br>(NCoR)                        | 1,035       | Nuclear receptor co-repression                                | DNA binding                                              |
| Q9CQW9              | Interferon-induced transmembrane<br>protein (IFITM3)            | 1,545       | Response to Interferon and<br>receptor-mediated endocytosis   | Role in the stability and<br>function of vacuolar ATPase |
|                     | <b>Unique protein</b>                                           |             |                                                               |                                                          |
| G3X8Q1              | Calcineurin binding protein 1<br>(Cabin1)                       | 5,571       | Negative regulation of cell death                             | Protein phosphatase 2B<br>inhibitor activity             |
