# Supplementary material for: Culture of Mycobacterium smegmatis in Different Carbon Sources to Induce In Vitro Cholesterol Consumption Leads to Alterations in the Host Cells after Infection: A Macrophage Proteomics Analysis
Source: MDPI journal article supplement (doi:10.3390/pathogens10060662), 2021-05-28
Supplement: s1 [file s1]

**Supplementary Table S3.** List of differentially regulated proteins from the group of macrophages infected with *Mycobacterium smegmatis* grown in minimal medium without supplementation (MM).

| Uniprot access code | Protein                                            | Fold-change | Biologic Process                                         | Molecular Function                                    |
|---------------------|----------------------------------------------------|-------------|----------------------------------------------------------|-------------------------------------------------------|
| <i>Up-regulated</i> |                                                    |             |                                                          |                                                       |
| Q8JZZ7              | Adhesion G protein-coupled receptor L2 (Adgrl2)    | 2,667808    | Cell surface receptor signaling pathway                  | G protein-coupled receptor activity                   |
| E9Q9F9              | Erythroid differentiation-related factor 1 (Edrf1) | 1,710174    | Positive regulation of transcription                     | Erythroid Differentiation                             |
| Q80TV8              | CLIP-associating protein 1 (CLASP1)                | 5,096183    | Microtubule cytoskeleton organization                    | Kinetochore binding                                   |
| Q9CQW9              | Interferon-induced transmembrane protein (IFITM3)  | 1,545       | Response to Interferon and receptor-mediated endocytosis | Role in the stability and function of vacuolar ATPase |
